# Supplementary material for: Small Molecule Activators of the Mitochondrial Protease ClpP Induce Senescence in Triple-Negative Breast Cancer Cells and Sensitize Cells to the Bcl-2 Inhibitor Venetoclax
Source: Research Square preprint supplement (doi:10.21203/rs.3.rs-7682325/v1), 2025-11-19
Supplement: Supplementary file 1 [file 67e050dfc9cfbf4401f9041d.docx]

**Supplementary Method Tables:**

**Table 1: Primers of ClpP sgRNA**

| **Primers for ClpP sgRNA** | **Sequence** |
| --- | --- |
| Forward primer for CLPP1 | TTGGGTGGCCCGGAATATTGGTAG |
| Reverse primer for CLPP1 | AAACCTACCAATATTCCGGGCCAC |
| Forward primer for CLPP2 | TTGGGGGGATGTGGCCCGGAATAT |
| Reverse primer for CLPP2 | AAACATATTCCGGGCCACATCCCC |
| Forward primer for CLPP3 | TTGGGCAGCGGTGCCTGCACGCGA |
| Reverse primer for CLPP3 | AAACTCGCGTGCAGGCACCGCTGC |

**Table 2: Antibodies**

| **Antibody** | **Manufacturer** | **Catalog number** | **Dilution Factor** |
| --- | --- | --- | --- |
| β-Actin | Santa Cruz | SC-47778 | 1000 |
| Vinculin | Santa Cruz | SC-73614 | 1000 |
| Total Rb | Santa Cruz | SC-50 | 1000 |
| Phospho-Rb (Ser807/811) | Cell Signaling | CS-8516 | 1000 |
| Lamin B1 | Cell Signaling | 125865 | 1000 |
| TUFM | Invitrogen | PA5-27511 | 1000 |
| Myc | Cell Signaling | 13987S | 1000 |
| GDF15 | Santa Cruz | SC-377195 | 1000 |
| Bad | Cell Signaling | CS-9292 | 1000 |
| cIAP-1 | Cell Signaling | CS-7065 | 1000 |
| Survivin | Cell Signaling | CS-2808 | 1000 |
| SMAC/Diablo | Cell Signaling | CS-15108 | 1000 |
| Cyclin A2 | Cell Signaling | CS-4656S | 1000 |
| Cyclin D3 | Cell Signaling | 2936 | 1000 |
| Cyclin E1 | Cell Signaling | CS-4129S | 1000 |
| Skp2 | Cell Signaling | 2652 | 1000 |
| p21 | Cell Signaling | CS-2947 | 1000 |
| gH2A.X (S139) | Cell Signaling | 2577S | 1000(IB), 500(IF) |
| p-Chk2 (T68) | Cell Signaling | 2661 | 1000 |
| Chk2 | Cell Signaling | 2662S | 1000 |
| p-S/Q motif | Cell Signaling | 9607S | 100 |
| 53BP1 | Santa Cruz | SC-517281 | 100 |
| Anti-Rabbit Alexa Fluor 568 | Invitrogen | A10042 | 500 |
| Anti-Mouse Alexa Fluor 488 | Invitrogen | A-11001 | 500 |
| p-Chk1 (S345) | Cell Signaling | 2348 | 1000 |
| Chk1 | Cell Signaling | 2360 | 1000 |
| p-ATM (S1981) | Abclonal | AP1030 | 1000 |
| ATM | Cell Signaling | 2873 | 1000 |
| p-ATR (T1989) | Cell signaling | 30632 | 1000 |
| ATR | Cell signaling | 13934 | 1000 |
| Anti-Rabbit IgG (H+L) HRP conjugate | Promega | W4011 | 10000 |
| Anti-Mouse IgG (H+L) HRP conjugate | Promega | W4021 | 10000 |

**Table 3: Primers for RT q-PCR**

| **Primer target** | **Sequence** |
| --- | --- |
| Forward primer for 18S | AGTCGGAGGTTCGAAGACGAT |
| Reverse primer for 18S | GCGGGTCATGGGAATAACG |
| Forward primer for IL-6 | CCTTCTCCACAAGCGCCTTC |
| Reverse primer for IL-6 | TCTTCTCCTGGGGGTACTGG |
| Forward primer for IL-8 | ACTGAGAGTGATTGAGAGTGGAC |
| Reverse primer for IL-8 | AACCCTCTGCACCCAGTTTTC |
| Forward primer for IL-12 | TCCAGAAGGCCAGACAAACTC |
| Reverse primer for IL-12 | TCCAATGGTAAACAGGCCTCC |
